# Supplementary material for: Comparison of patients diagnosed with gonorrhoea through community screening with those self-presenting to the genitourinary medicine clinic
Source: PubMed Central journal article supplement — BMJ Open. 2014 Mar 14;4(3):e004862. doi: 10.1136/bmjopen-2014-004862 (PMC3963091; doi:10.1136/bmjopen-2014-004862), 2014-03-14
Supplement: bmjopen-2014-004862.reviewer_comments.pdf [file bmjopen-2014-004862.reviewer_comments.pdf]

## PEER REVIEW HISTORY

BMJ Open publishes all reviews undertaken for accepted manuscripts. Reviewers are asked to complete a checklist review form ([see an example](#)) and are provided with free text boxes to elaborate on their assessment. These free text comments are reproduced below.

This paper was submitted to the STI but declined for publication following peer review. The authors addressed the reviewers' comments and submitted the revised paper to BMJ Open where it was re-reviewed and accepted.

## ARTICLE DETAILS

|                            |                                                                                                                                               |
|----------------------------|-----------------------------------------------------------------------------------------------------------------------------------------------|
| <b>TITLE (PROVISIONAL)</b> | Comparison of patients diagnosed with gonorrhoea through community screening with those self-presenting to the genito-urinary medicine clinic |
| <b>AUTHORS</b>             | Cook, Penny; Evans-Jones, John; Mallinson, Harry; Wood, Martyn; Alloba, Fath; Jones, Kathy; Strodtbeck, Sara; Hanna-Bashara, Layla            |

## VERSION 1 - REVIEW

- The manuscript received two reviews from The STI Journal but the reviewers have declined to make their comments public.

## VERSION 2 – REVIEW

|                        |                                            |
|------------------------|--------------------------------------------|
| <b>REVIEWER</b>        | Dr J Kevin Dunbar<br>Public Health England |
| <b>REVIEW RETURNED</b> | 03-Feb-2014                                |

- The reviewer completed the checklist but made no further comments.
